# Supplementary material for: Blocking the 5′ splice site of exon 4 by a morpholino oligomer triggers APOL1 protein isoform switch
Source: PubMed Central journal article supplement (PMC5992166; doi:10.1038/s41598-018-27104-x), 2018-06-07

## **Supplementary Information**

### **Blocking the 5' splice site of exon 4 by a morpholino oligomer triggers APOL1 protein isoform switch**

Amber M. Cheatham<sup>1</sup>, Shamara E. Davis<sup>1</sup>, Atanu Khatua<sup>1</sup> & Waldemar Popik<sup>1,2\*</sup>

<sup>1</sup>Meharry Medical College, Center for AIDS Health Disparities Research, Department of Microbiology and Immunology, and <sup>2</sup>Department of Internal Medicine, 1005 D. B. Todd Blvd, Nashville, TN 37028, USA.

# Supplementary Figure 1

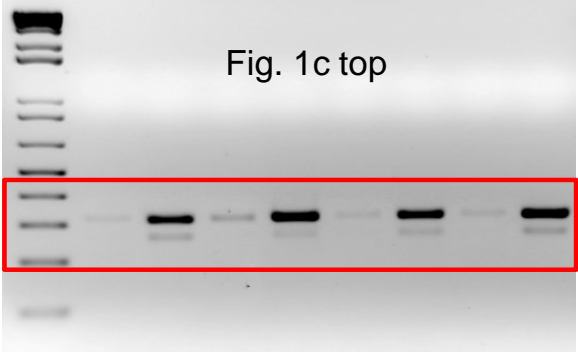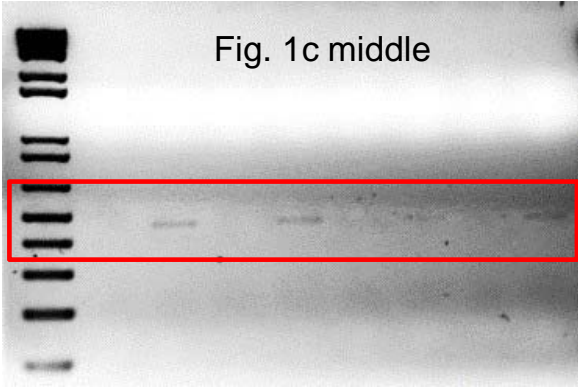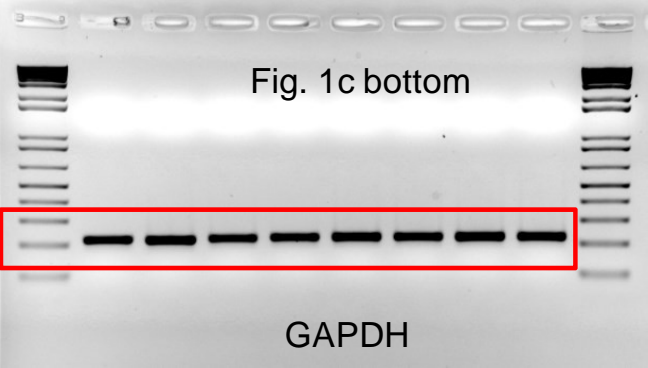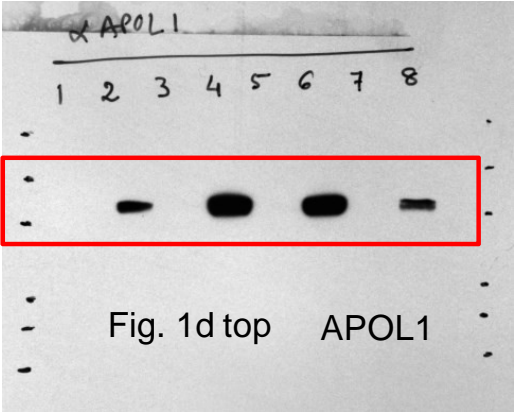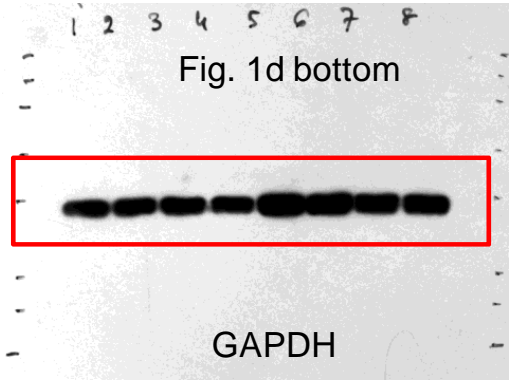

# Supplementary Figure 2

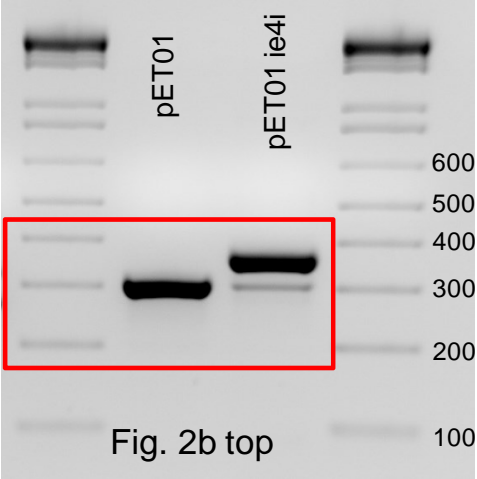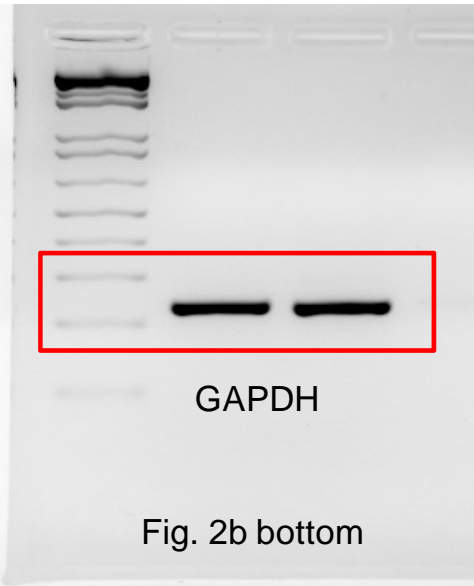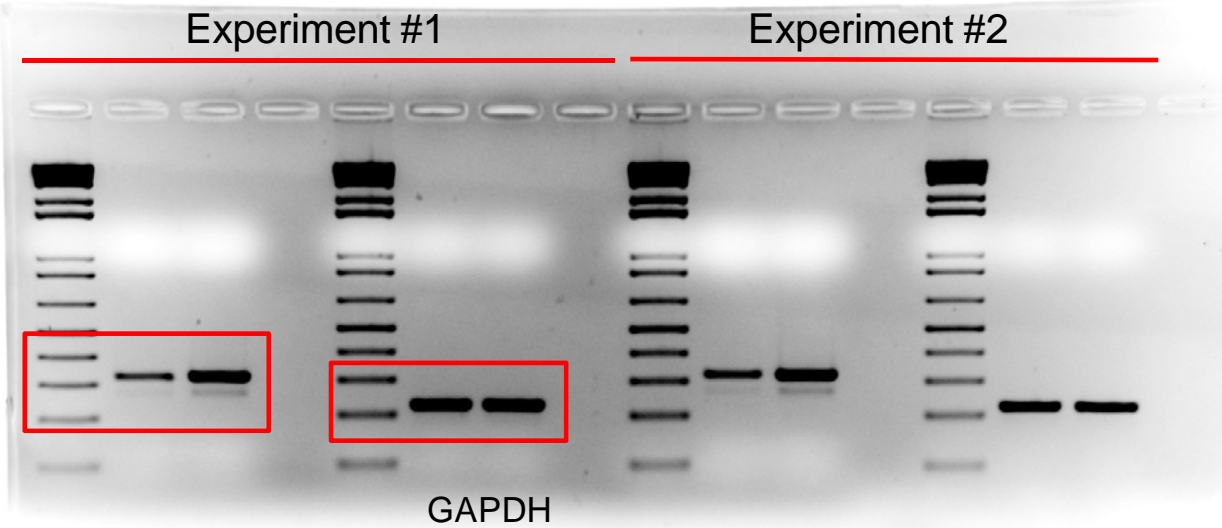

# Supplementary Figure 3

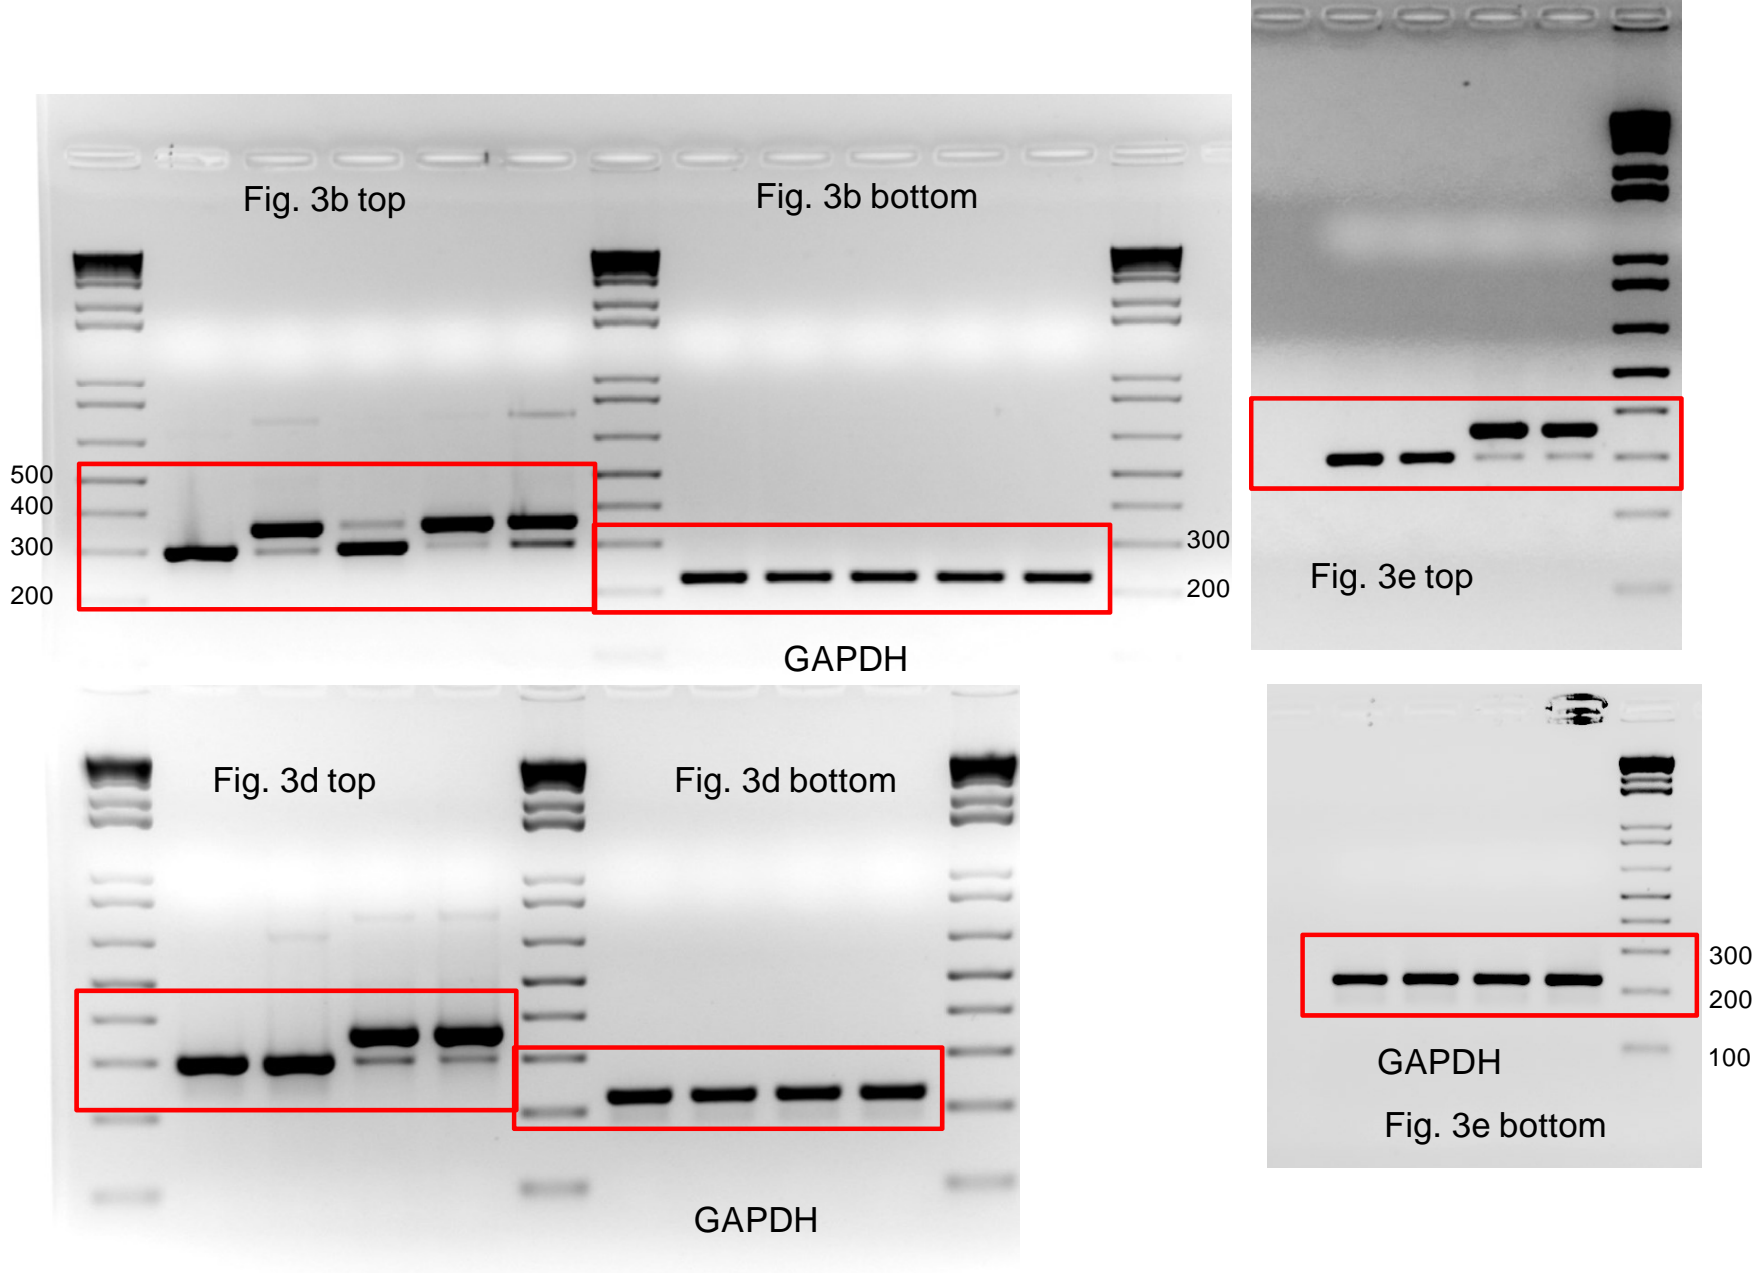

# Supplementary Figure 4

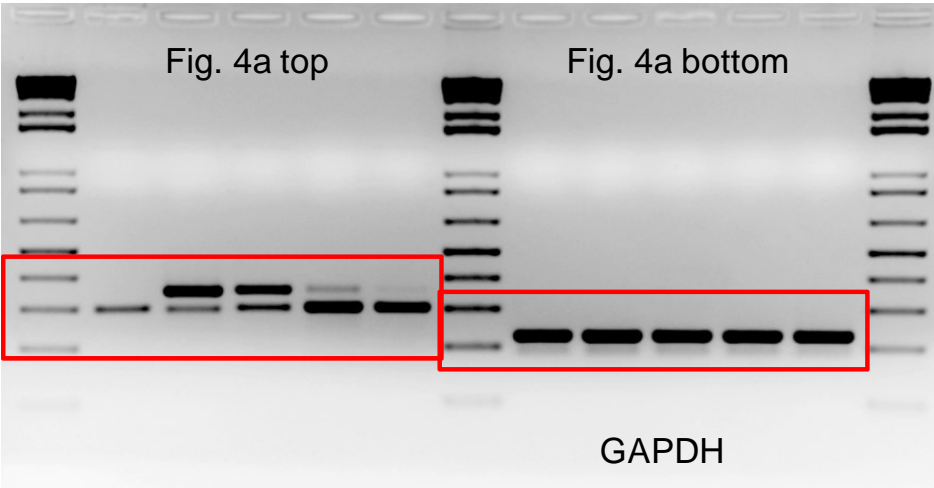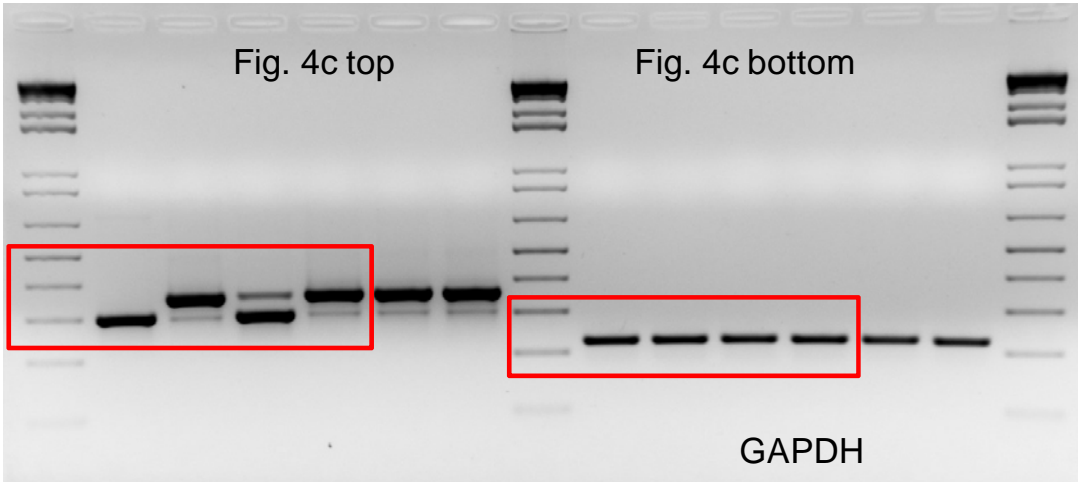

# Supplementary Figure 5

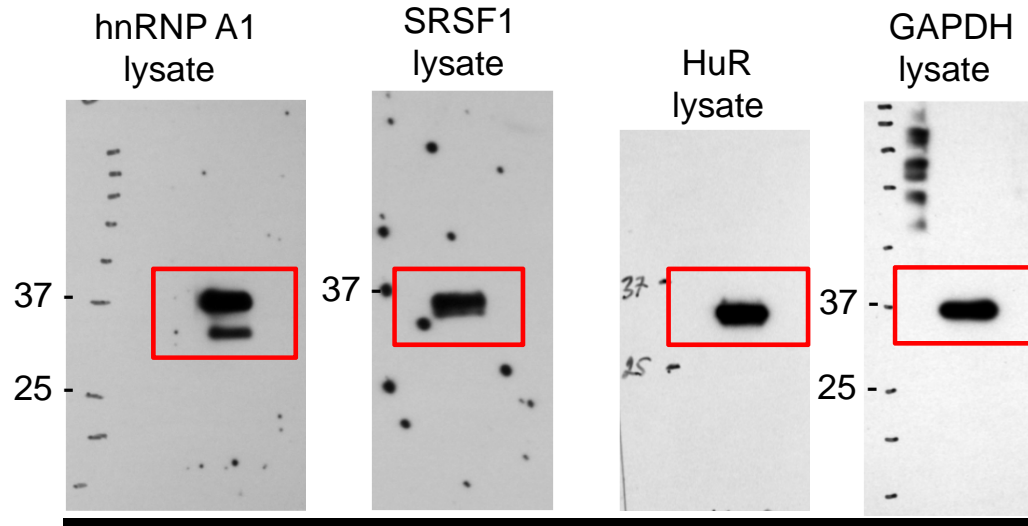

Figure 5a

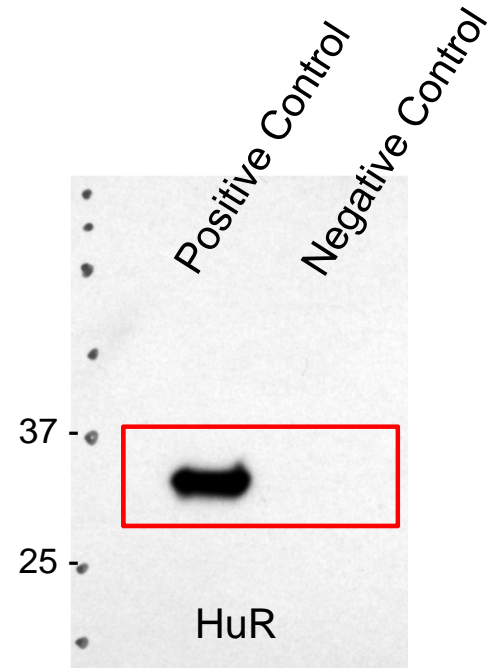

Figure 5b

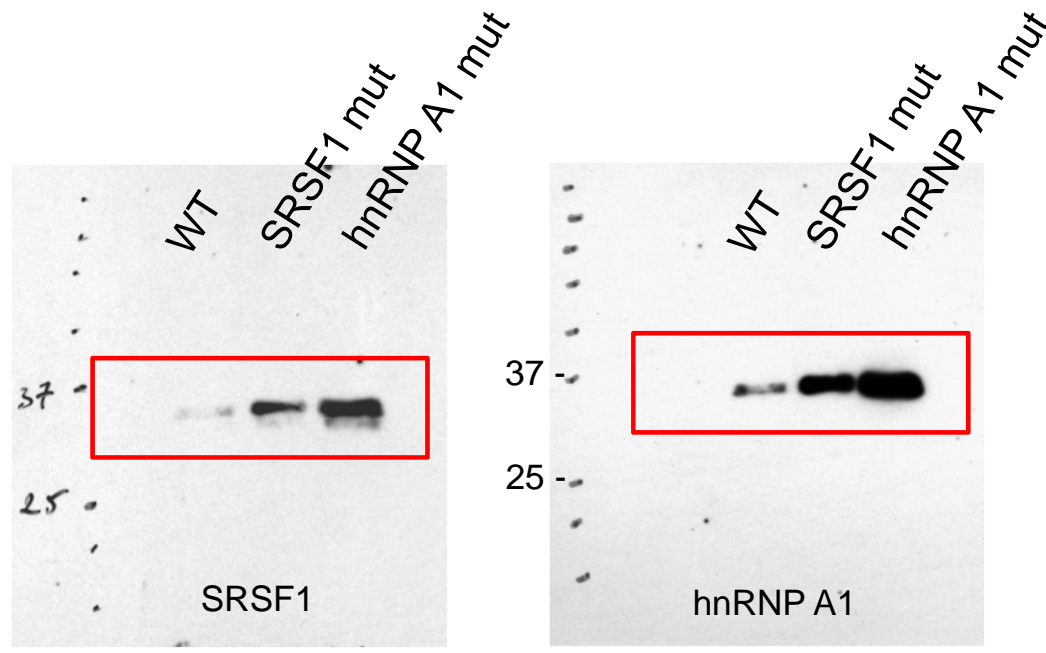

Figure 5d



# Supplementary Figure 6

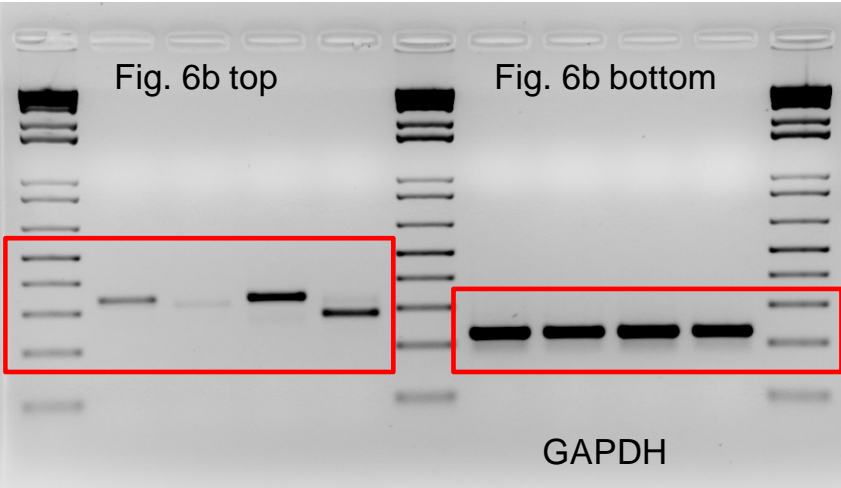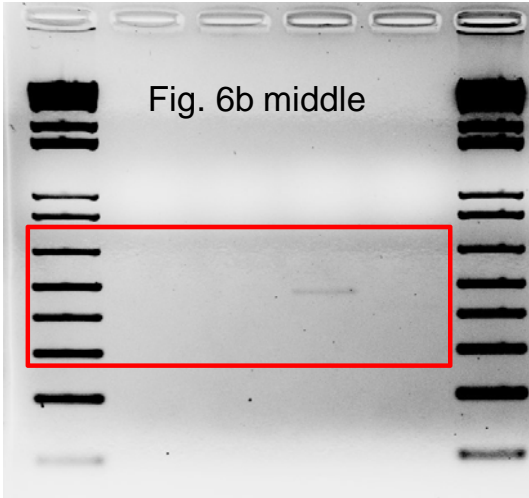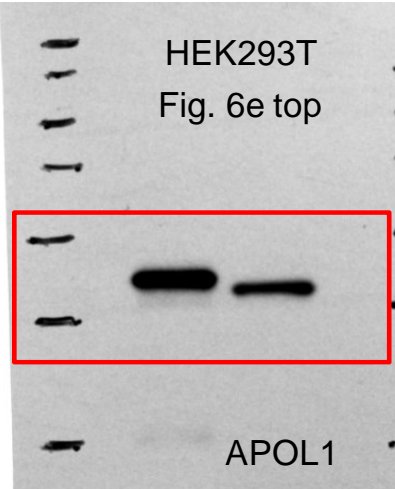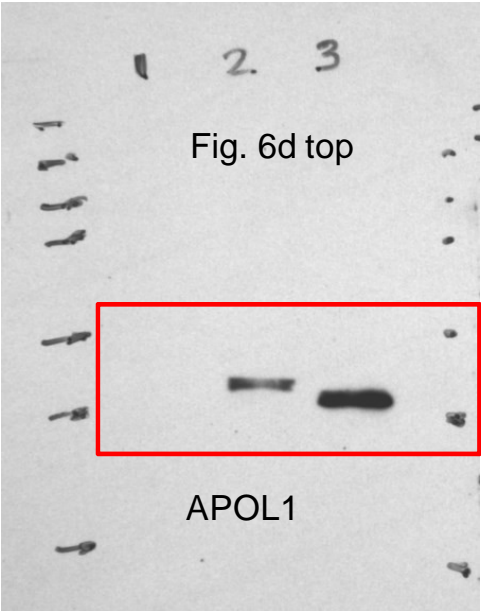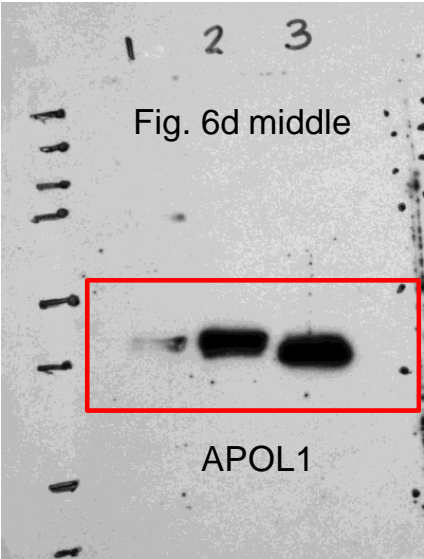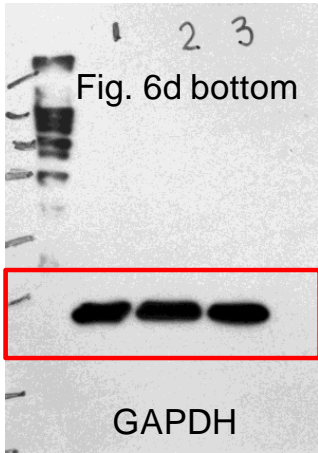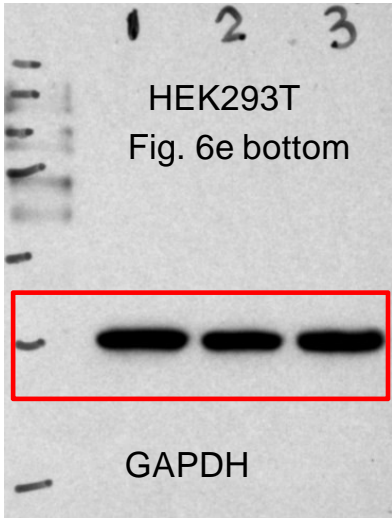

Supplement: 41598_2018_27104_MOESM1_ESM.pdf [file 41598_2018_27104_MOESM1_ESM.pdf]
